# Supplementary figures and images for: Exponential replicate broadcasting mechanism for adaptive bandwidth allocation in mobile networks
Source: Springer Nature journal article supplement (doi:10.1186/1687-1499-2014-136), 2014-08-18

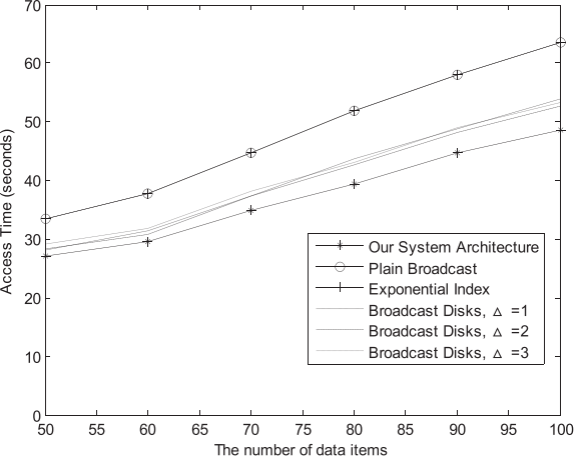

(a)

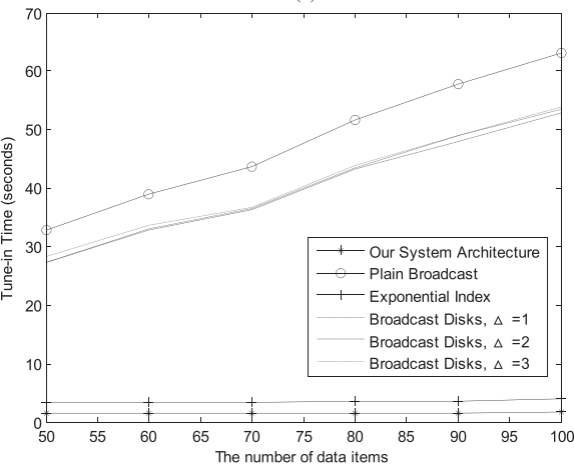

(b)

Supplement: 13638_2014_957_MOESM11_ESM.pdf [file 13638_2014_957_MOESM11_ESM.pdf]

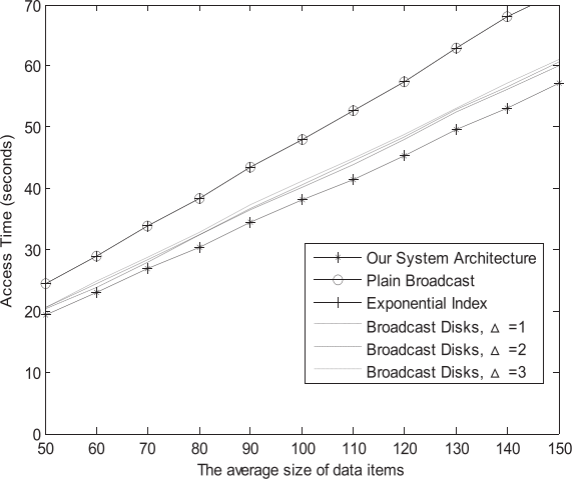

(a)

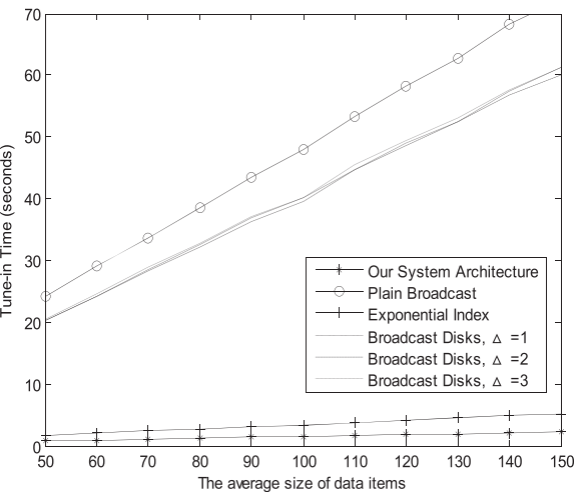

(b)

Supplement: 13638_2014_957_MOESM12_ESM.pdf [file 13638_2014_957_MOESM12_ESM.pdf]

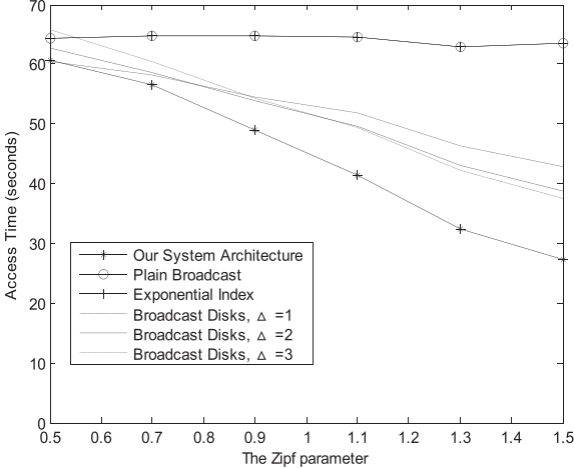

(a)

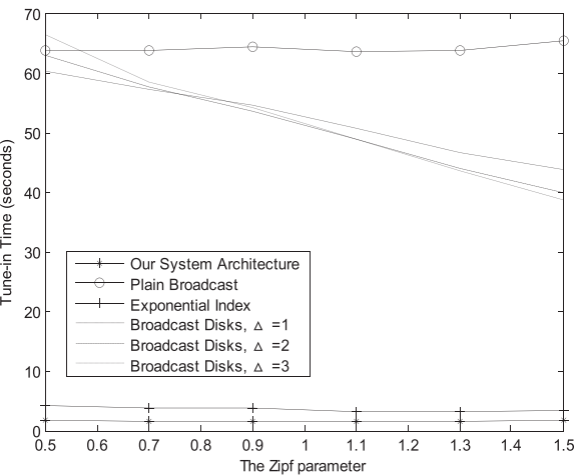

(b)

Supplement: 13638_2014_957_MOESM13_ESM.pdf [file 13638_2014_957_MOESM13_ESM.pdf]

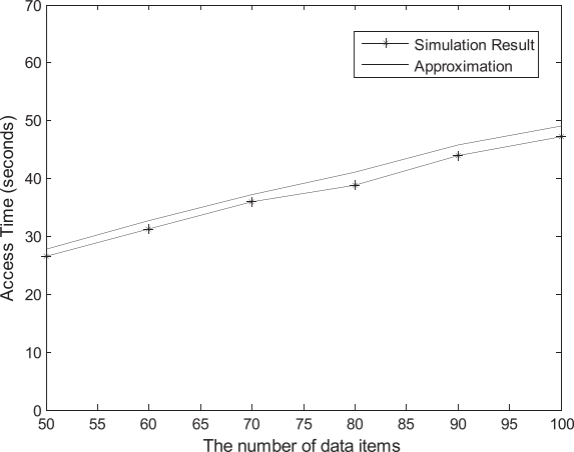

Supplement: 13638_2014_957_MOESM14_ESM.pdf [file 13638_2014_957_MOESM14_ESM.pdf]

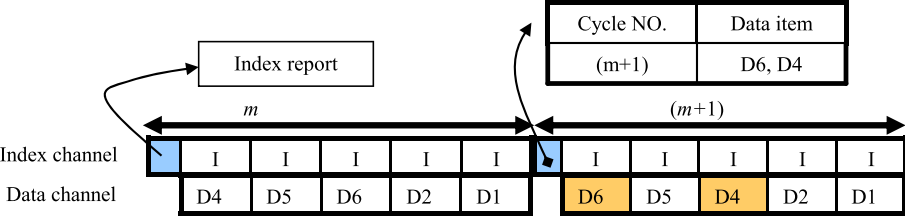

Supplement: 13638_2014_957_MOESM16_ESM.pdf [file 13638_2014_957_MOESM16_ESM.pdf]

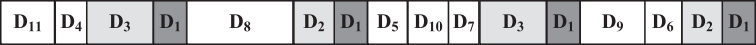

Supplement: 13638_2014_957_MOESM6_ESM.pdf [file 13638_2014_957_MOESM6_ESM.pdf]
